# Supplementary material for: CT-Angiography-Based Outcome Prediction on Diabetic Foot Ulcer Patients: A Statistical Learning Approach
Source: MDPI journal article supplement (doi:10.3390/diagnostics12051076), 2022-04-25
Supplement: s1 [file s1]

## CT scanning parameters and contrast material injection protocol

### CT Scanning Parameters

The multiple-detector CT (MDCT) scanners involved in this study can be summarized into three types. The detailed scanning parameters are listed in Table S1.

**Table S1: Scanning Parameters for Lower extremity CTA**

| Equipment         | Rotation Time (sec) | Detector-row Width (mm) | Pitch | Table Speed(mm/sec) | Scan Time (sec) |
|-------------------|---------------------|-------------------------|-------|---------------------|-----------------|
| 16-MDCT (Siemens) | 0.5                 | 0.75                    | 1.5   | 18                  | 40              |
| 64-MDCT (Siemens) | 0.5                 | 0.6                     | 0.85  | 30                  | 40-42           |
| 64-MDCT (GE)      | 0.5                 | 1.25                    | 0.516 | 41.2                | 29-31           |

NOTE: MDCT: multiple-detector CT

### Contrast Material Injection Protocol

A total volume of 120mL of nonionic contrast material (iohexol [Omnipaque 300 mg/mL, Daiichi-Sankyo]; Iodixanol [Visipaque 320 mg/mL, Amersham Health]; Iopromide [Ultravist 300 mg/mL, Schering]) was injected through a 20-gauge catheter into the antecubital vein with a power injector. The detailed contrast material injection protocols are shown in table 2.

**Table S2: Contrast Material Injection Protocol for Lower extremity CTA**

| Equipment         | Injection Duration (sec) | Scanning delay (sec) | Injection flow rates (mL/sec) |
|-------------------|--------------------------|----------------------|-------------------------------|
| 16-MDCT (Siemens) | 35                       | 10                   | 4                             |
| 64-MDCT (Siemens) | 35                       | 10                   | 3-4                           |
| 64-MDCT (GE)      | 35                       | 9-11                 | 3                             |

NOTE: MDCT: multiple-detector CT
